# Supplementary material
Source: publisher figshare collection journal article supplement (https://acs.figshare.com/ndownloader/files/21823233)
Supplement: Supplementary file 1 [file 21823233]

## **Supporting Information**

### **Selective Hydrogenation of the C<sub>8</sub> Aromatic Fraction of Pyrolysis Gasoline over NiZn<sub>3</sub>/α-Al<sub>2</sub>O<sub>3</sub>: Experimental and Modeling Studies**

Zhichang Bao, Lei Yang, Zhenmin Cheng, and Zhiming Zhou\*

*School of Chemical Engineering*

*East China University of Science and Technology*

*Shanghai 200237, China*

\* Corresponding author: zmzhou@ecust.edu.cn; Tel.: +86-21-64252230; Fax: +86-21-64253528.

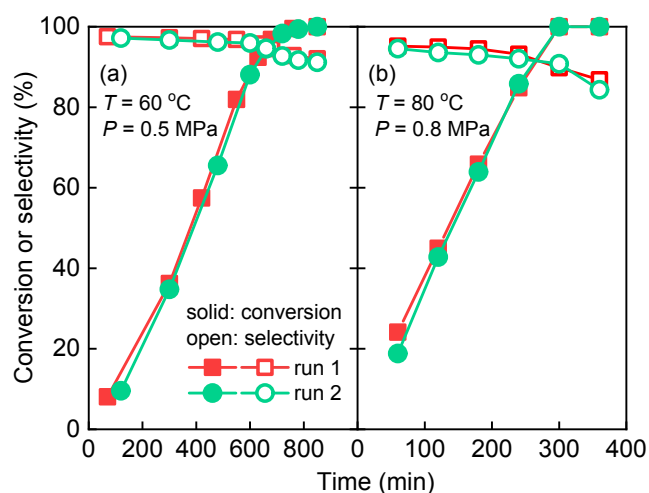

**Figure S1.** Reproducibility test of the phenylacetylene hydrogenation over  $\text{NiZn}_3/\alpha\text{-Al}_2\text{O}_3$  (conditions: (a)  $60\text{ }^{\circ}\text{C}$  and  $0.5\text{ MPa}$ ; (b)  $80\text{ }^{\circ}\text{C}$  and  $0.8\text{ MPa}$ ). It is clear that a good reproducibility is obtained in two repeated runs under different conditions.

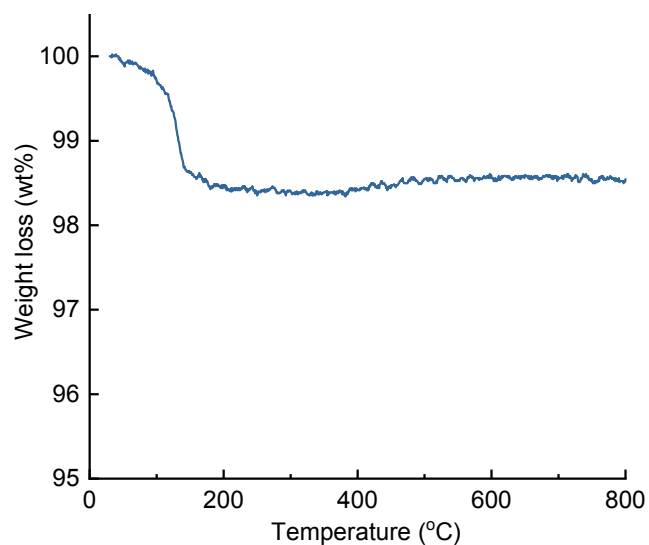

**Figure S2.** TGA curve of 100 h-used  $\text{NiZn}_3/\alpha\text{-Al}_2\text{O}_3$  (with a heating rate of  $10\text{ }^{\circ}\text{C}/\text{min}$  in air). The weight loss at temperatures lower than  $200\text{ }^{\circ}\text{C}$  is attributed to the adsorbed organic species and water, while the slight weight increase at above  $400\text{ }^{\circ}\text{C}$  is ascribed to the oxidation of metallic Ni. This figure indicates that no coke formation occurs on  $\text{NiZn}_3/\alpha\text{-Al}_2\text{O}_3$ .
